# Supplementary material for: Mutations in the tomato gibberellin receptors suppresses xylem proliferation and reduces water loss under water-deficit conditions
Source: bioRxiv or medRxiv preprint supplement (doi:10.1101/2020.01.06.895011), 2020-01-06
Supplement: Supplementary file [file media-1.pdf]

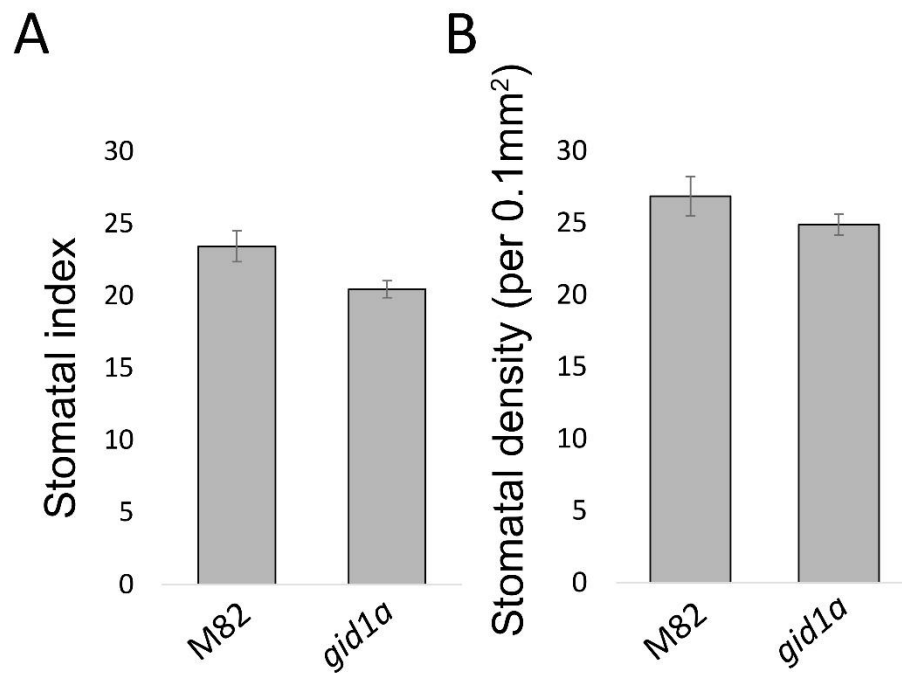

**Fig. S1.** The loss of GID1a has no effect on stomatal density or index. **A.** Stomatal density (per 0.1 mm<sup>2</sup>). **B.** Stomatal index (number of stomata to epidermal cells). Values are means of five replicates (5 different plants) ± SE.
