# Supplementary material for: Mutations in the tomato gibberellin receptors suppresses xylem proliferation and reduces water loss under water-deficit conditions
Source: bioRxiv or medRxiv preprint supplement (doi:10.1101/2020.01.06.895011), 2020-01-06
Supplement: Supplementary file [file media-2.pdf]

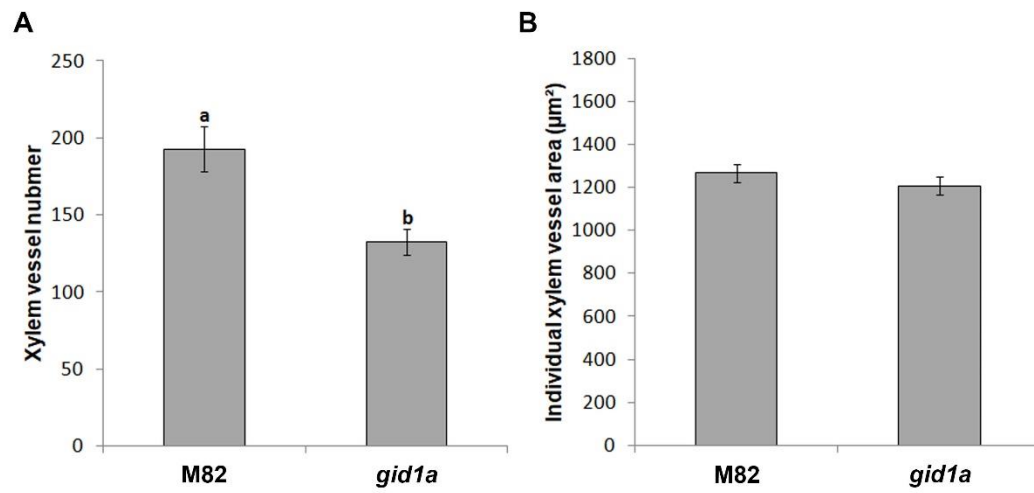

**Fig. S2. A.** Xylem vessel number in M82 and *gid1a* stems. **B.** Area mean of individual xylem vessel in M82 and *gid1a* stems. Values in **A** and **B** are means of 6 plants  $\pm$  SE.
