# Supplementary material for: Mutations in the tomato gibberellin receptors suppresses xylem proliferation and reduces water loss under water-deficit conditions
Source: bioRxiv or medRxiv preprint supplement (doi:10.1101/2020.01.06.895011), 2020-01-06
Supplement: Supplementary file [file media-3.pdf]

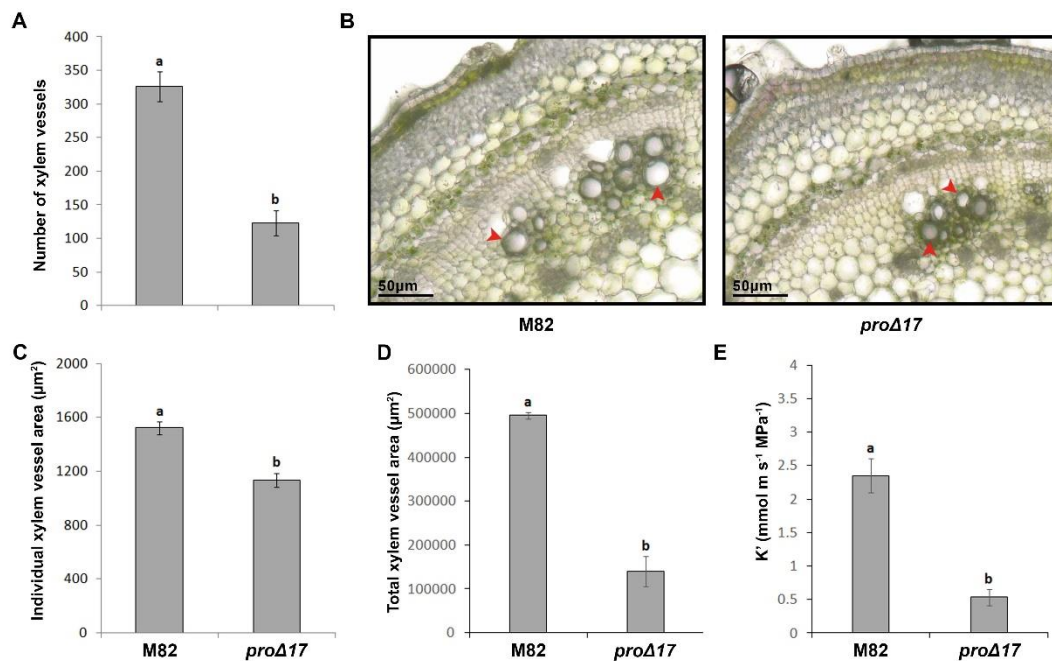

**Fig. S3. A.** Xylem vessel number in the stems of five-weeks-old M82 and 35:*proΔ17* plants. **B.** Representative stem cross-sections of M82 and 35:*proΔ17*. Scale bar = 50  $\mu\text{m}$ . **C.** Area mean of individual xylem vessel in M82 and 35:*proΔ17* stems. **D.** Total xylem vessel area in M82 and 35:*proΔ17* stems. **E.** Hydraulic conductance measured in detached stem segments, taken from five-weeks-old M82 and 35:*proΔ17*. Values in **A**, **C**, **D** and **E** are means of 6 plants  $\pm$  SE. Small letters represent significant differences between the lines (Student's *t* test,  $P < 0.05$ ).
