# Supplementary material for: Mutations in the tomato gibberellin receptors suppresses xylem proliferation and reduces water loss under water-deficit conditions
Source: bioRxiv or medRxiv preprint supplement (doi:10.1101/2020.01.06.895011), 2020-01-06
Supplement: Supplementary file [file media-4.pdf]

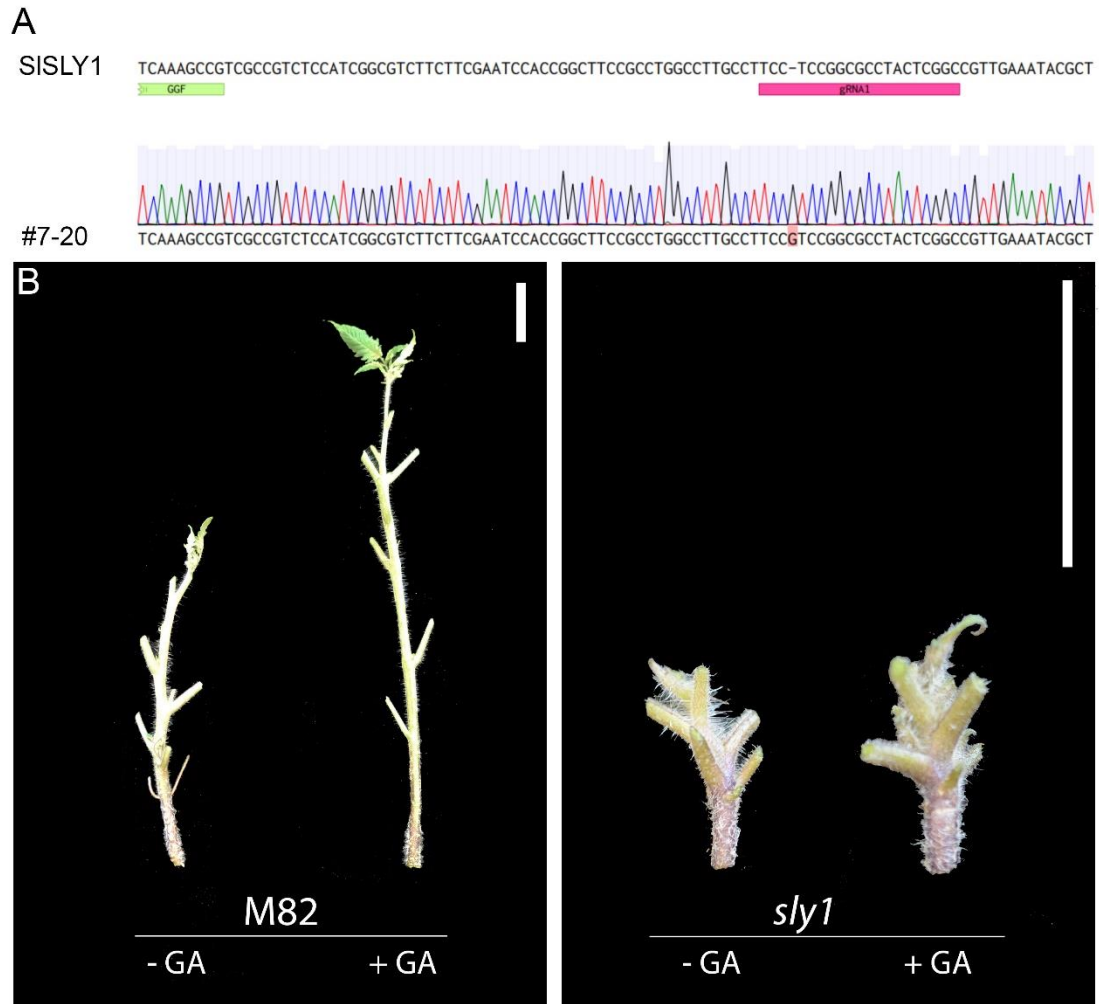

**Fig. S4.** Molecular and phenotypic characterization of *sly1*. Sequence of *SISLY1* mutant alleles. **A.** Sequences of *SLY1* wild-type (upper) and *sly1* mutant allele #7-20 with one nucleotide deletion (G, marked pink). Pink bar represents RNA guide sequence. **B.** Effect of 100  $\mu$ M GA3 treatment on the elongation of M82 and *sly1*. Leaves were removed to show internode elongation. Scale bar = 2 cm.
